# Supplementary material for: Cadmium in Herbal Weight Loss Products as a Health Risk Factor for Consumers
Source: Research Square preprint supplement (doi:10.21203/rs.3.rs-137320/v1), 2021-01-11
Supplement: Supplementary file 1 [file c32e44bc9c85af6bec7b3e5e.docx]

**Cadmium in herbal weight loss products as a health risk factor for consumers**

Grzegorz Dziubanek*a* , Dawid Konwant *b*, Danuta Rogala*c**, Joanna Domagalska*a*

aDepartment of Environmental Health Risk Factors, Faculty of Health Sciences in Bytom, Medical University of Silesia in Katowice (Poland), 18 Piekarska Street, 41-902 Bytom, Poland, e-mail address: gdziubanek@sum.edu.pl (https://orcid.org/0000-0002-1972-7221), drogala@sum.edu.pl (https://orcid.org/0000-0001-5995-8246), jdomagalska@sum.edu.pl (https://orcid.org/0000-0002-4471-3147)

b Doctoral School, Medical University of Silesia in Katowice (Poland), 15 Poniatowskiego Street, 40-055 Katowice, Poland, e-mail address: dawid.konwant@med.sum.edu.pl (https://orcid.org/0000-0003-0704-6282)

c Department of Environmental Health, Faculty of Health Sciences in Bytom, Medical University of Silesia in Katowice (Poland), 18 Piekarska Street, 41-902 Bytom, Poland, e-mail address: drogala@sum.edu.pl (https://orcid.org/0000-0001-5995-8246),

***Corresponding author**: Danuta Rogala, Department of Environmental Health, Faculty of Health Sciences in Bytom, Medical University of Silesia in Katowice (Poland). 18 Piekarska Street, 41-902 Bytom, Poland. Tel. +48 323976525, e-mail address: drogala@sum.edu.pl

**Supplementary Material I.** Characteristics of the samples of herbal weight loss products.

| Sample no. | Manufacturer | Type |
| --- | --- | --- |
| 1 / 1a* | I | Dietary supplement |
| 2 / 2a* | II | Dietary supplement |
| 3 / 3a* | III | Dietary supplement |
| 4 / 4a* | IV | Dietary supplement |
| 5 / 5a* | V | Dietary supplement |
| 6 / 6a* | VI | Dietary supplement |
| 7 / 7a* | VII | Dietary supplement |
| 8 / 8a* | VIII | Dietary supplement |
| 9 / 9a* | IX | Dietary supplement |
| 10 / 10a* | X | Dietary supplement |
| 11 / 11a* | XI | Dietary supplement |
| 12 / 12a* | XII | Dietary supplement |
| 13 / 13a* | XII | Dietary supplement |
| 14 / 14a* | VII | Dietary supplement |
| 15 / 15a* | XIV | Dietary supplement |
| 16 / 16a* | XV | Dietary supplement |
| 17 / 17a* | XVI | Dietary supplement |
| 18 / 18a* | XVII | Herbal product |
| 19 / 19a* | XVIII | Herbal product |
| 20 / 20a* | XIX | Herbal product |
| 21 / 21a* | XX | Herbal product |
| 22 / 22a* | XXI | Herbal product |
| 23 / 23a* | XXII | Herbal product |
| 24 / 24a* | XXIII | Herbal product |
| 25 / 25a* | XXIV | Herbal product |
| 26 / 26a* | XXV | Herbal product |
| 27 / 27a* | XXVI | Herbal product |
| 28 / 28a* | XXVII | Herbal product |
| 29 / 29a* | XXVIII | Herbal product |

* infusion
